# Supplementary material
Source: PubMed Central journal article supplement (PMC8667626)
Supplement: GRL-48-e2021GL095396-s001.pdf [file GRL-48-e2021GL095396-s001.pdf]

# Supporting Information for: On the detection of COVID-driven changes in atmospheric carbon dioxide

Nicole S. Lovenduski<sup>1</sup>, Abhishek Chatterjee<sup>2,\*</sup>, Neil C. Swart<sup>3</sup>, John C. Fyfe<sup>3</sup>,  
Ralph F. Keeling<sup>4</sup>, David Schimel<sup>2</sup>

<sup>1</sup>Department of Atmospheric and Oceanic Sciences and Institute of Arctic and Alpine Research,  
University of Colorado, Boulder, CO, USA

<sup>2</sup>Carbon Cycle and Ecosystems Group, Jet Propulsion Laboratory, California Institute of Technology,  
Pasadena, CA, USA

<sup>3</sup>Canadian Centre for Climate Modelling and Analysis, Environment and Climate Change Canada,  
Victoria, BC, Canada

<sup>4</sup>Scripps Institution of Oceanography, University of California San Diego, La Jolla, CA, USA  
\*previously at USRA / NASA Goddard Space Flight Center, Greenbelt, MD, USA

## Contents of this file

1. Figures S1 to S4

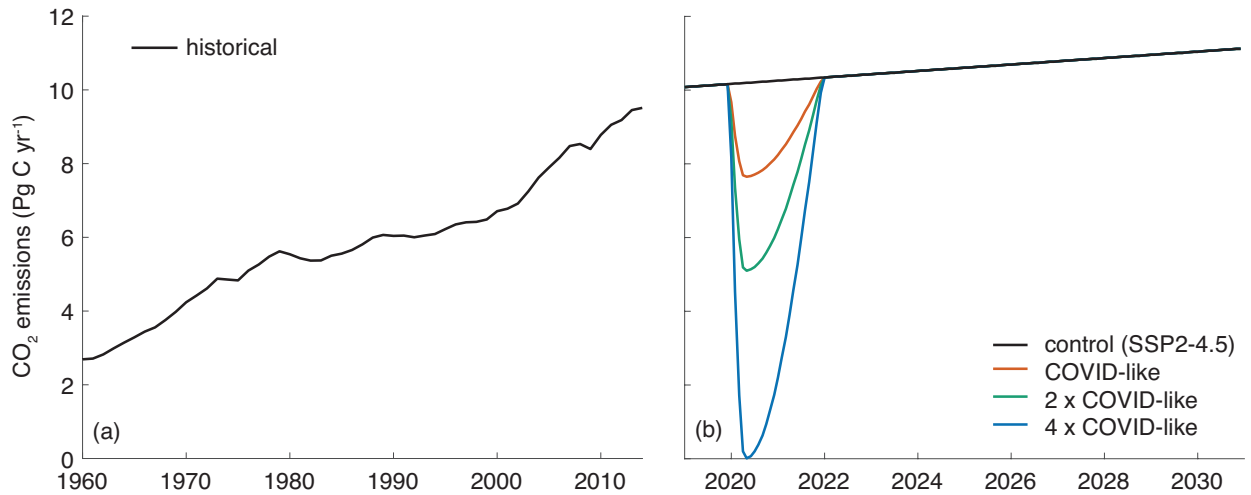

**Figure S1.** Global-mean, de-seasoned CO<sub>2</sub> emissions (Pg C yr<sup>-1</sup>) (a) over the historical period, and (b) for the (black) control / SSP2-4.5, (red) COVID-like, (green) 2 × COVID-like, and (blue) 4 × COVID-like scenarios.

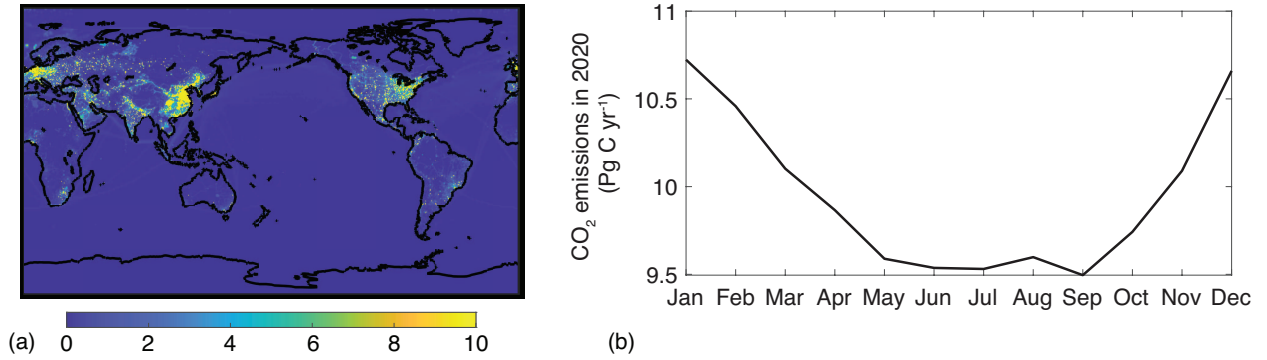

18 **Figure S2.** (a) Spatial distribution of 2020 annual-mean CO<sub>2</sub> emissions for the control (SSP2-  
 19 4.5) ensemble (kg m<sup>-2</sup> yr<sup>-1</sup>). (b) Seasonally varying 2020 global-mean CO<sub>2</sub> emissions for the  
 20 control (SSP2-4.5) ensemble (Pg C yr<sup>-1</sup>).

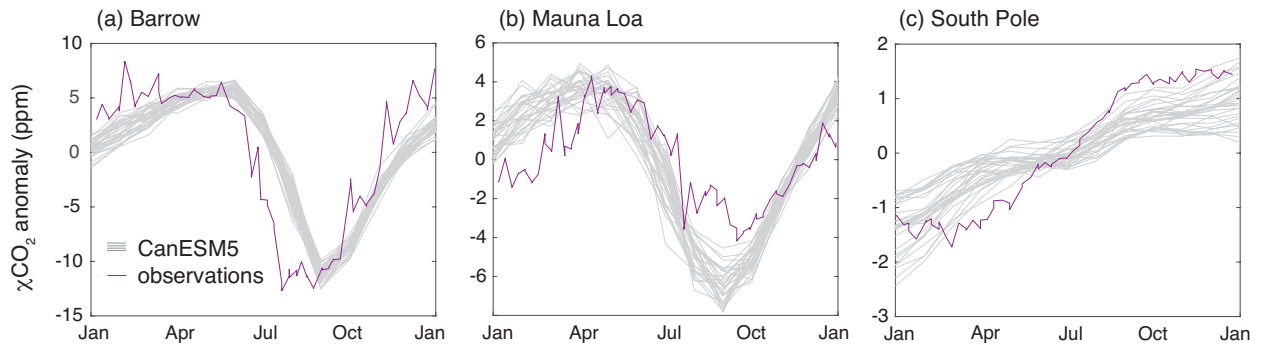

21 **Figure S3.** Monthly  $\chi$ CO<sub>2</sub> anomaly (ppm) relative to the time-mean  $\chi$ CO<sub>2</sub> from (gray)  
 22 the CanESM5 control ensemble and (purple) observations during 2015 at (a) Point Barrow, (b)  
 23 Mauna Loa, and (c) South Pole stations.

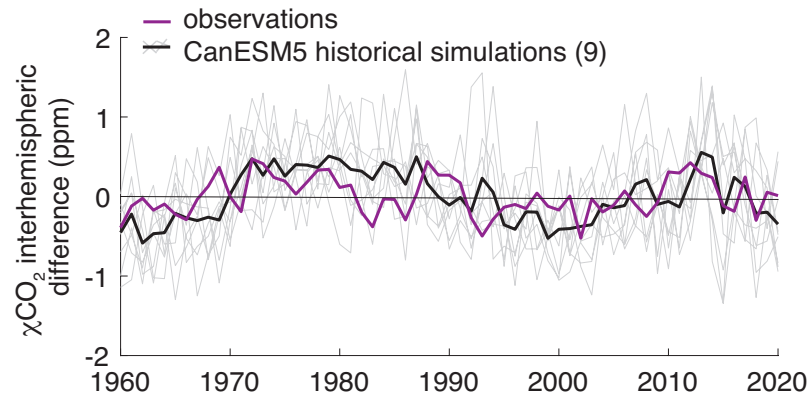

24 **Figure S4.** Annual-mean, de-trended interhemispheric difference in  $\chi$ CO<sub>2</sub> (Mauna Loa mi-  
 25 nus South Pole; ppm) from (purple) observations, and (gray/black) the CanESM5 historical  
 26 simulations. Gray lines show individual model ensemble members, and thick black line shows  
 27 the ensemble mean. Number in parenthesis on legend corresponds to the number of ensemble  
 28 members plotted.
